# Supplementary material for: Food insecurity and men’s perpetration of partner violence in a longitudinal cohort in South Africa
Source: PubMed Central journal article supplement (PMC9237862; doi:10.1136/bmjnph-2021-000288), 2022-02-07
Supplement: bmjnph-2021-000288supp001.pdf [file bmjnph-2021-000288supp001.pdf]

**Supplemental Table: Bidirectional cross-lagged dynamic panel model of food insecurity (n = 2,478)**

|                                                                                                                                                                | <b>Coef</b> | <b>SE</b> | <b>p value</b> |
|----------------------------------------------------------------------------------------------------------------------------------------------------------------|-------------|-----------|----------------|
| <b>Time variant variables</b>                                                                                                                                  |             |           |                |
| IPV perpetration intensity                                                                                                                                     | 0.02        | 0.02      | 0.276          |
| Housing status                                                                                                                                                 | 0.01        | 0.13      | 0.962          |
| <b>Time invariant variables</b>                                                                                                                                |             |           |                |
| Age at baseline                                                                                                                                                | 0.05        | 0.01      | <0.001         |
| Childhood abuse                                                                                                                                                | 0.05        | 0.01      | <0.001         |
| Alpha                                                                                                                                                          | 2.00        | 22.20     | 0.928          |
| <b>Fit indices</b>                                                                                                                                             |             |           |                |
| Chi2                                                                                                                                                           | 5.13        |           |                |
| Chi2 p-value                                                                                                                                                   | 0.40        |           |                |
| Degrees of freedom                                                                                                                                             | 4           |           |                |
| RMSEA                                                                                                                                                          | 0.080       |           |                |
| CFI                                                                                                                                                            | 0.661       |           |                |
| Coef: standardized coefficient; SE:standard error; IPV: intimate partner violence; RMSEA: root mean squared error of approximation; CFI: comparative fit index |             |           |                |
